# Supplementary material for: Assessing the impact of Mobility-as-a-Service (MaaS) on sustainable urban travel behaviors: a systematic literature review
Source: Frontiers journal article supplement (doi:10.3389/frsc.2025.1645488), 2025-10-01
Supplement: Supplementary_file_1.docx [file Supplementary_file_1.docx]

**Supplementary Table S1** List of studies included in the systematic review.

| Author | Year | Title | Journal | Country | Study Design | Data Collection | Analysis | Findings | Relevance | |
| --- | --- | --- | --- | --- | --- | --- | --- | --- | --- | --- |
| Abbasi et al. | 2022 | Carsharing travel distance and its associated factors: A case study of Seoul, South Korea | Journal Of Cleaner Production | South Korea | Quantitative, observational design | Secondary transaction data; supplementary spatial data | Regression Tree Analysis; Multilevel Mixed-Effect Modeling | The study found that carsharing trip distances are significantly influenced by users’ personal characteristics (gender, age), usage patterns (time of day, workday vs. non-workday), and the built environment around stations, with 24% of variation explained by station location. | These results suggest that integrating carsharing into MaaS can support more sustainable travel behaviour by aligning service design with user profiles and land-use contexts, thereby encouraging shifts away from private car ownership. | |
| Abouelela et al. | 2024 | Psychological factors impacts on carsharing use | Transportation | Germany | Quantitative cross-sectional survey | Online survey (4 parts: general travel behavior; carsharing usage and familiarity; stated preference experiment; sociodemographics and personality traits) | Hybrid Choice Models (HCM) | This study found that familiarity with carsharing services was the strongest predictor of adoption, followed by having a driving license and higher education, while app-related features were more important than physical service attributes in determining user preferences. | improving digital accessibility, marketing to increase awareness, and integrating carsharing with public transport in MaaS platforms can boost multimodality and support sustainable mobility transitions. | |
| Aboutorabi Kashani et al. | 2023 | What Makes Parents Consider Shared Autonomous Vehicles as a School Travel Mode? | Sustainability | Iran | Quantitative stated preference survey | Web-based questionnaire | Generalized ordered logit model | The study shows that parents' willingness to let children use shared autonomous vehicles is shaped by accident history, socioeconomic status, and car dependence versus trust in safety features, environmental attitudes, and openness to innovation. | MaaS adoption for families will depend not only on affordability but also on building confidence in safety and communicating environmental benefits, which can guide how MaaS services are positioned to encourage sustainable travel choices. | |
| Acheampong et al. | 2023 | Is ride-hailing a step closer to personal car use? Exploring associations between car-based ride-hailing and car ownership and use aspirations among young adults | Travel Behaviour and Society | Ghana | Quantitative cross-sectional survey | Structured, self-completed online survey (Young adults (18-35 years old)) | Structural Equation Modeling (SEM) | The study found that car-based ride-hailing in Ghana strengthens rather than reduces car ownership aspirations by introducing users to car-based mobility and shaping habits toward future private vehicle ownership. | Reveals a key challenge for MaaS in developing countries, where ride-hailing may encourage car ownership rather than sustainability, highlighting the need to integrate public transport and active mobility to avoid reinforcing car dependence | |
| Acheampong et al. | 2021 | Can autonomous vehicles enable sustainable mobility in future cities? Insights and policy challenges from user preferences over different urban transport options | Cities | Ireland | Quantitative cross-sectional survey | Structured questionnaire survey (two part: background and latent concepts; specific AV use options) | Structural Equation Modeling (SEM) | Pro-environmental attitudes increased willingness to use public transport and shared autonomous vehicles but decreased ownership preferences, though overall preferences remained highest for autonomous vehicle ownership, with current travel patterns likely to persist despite autonomous technology. | Suggests future transport must bridge the gap between positive environmental attitudes and actual travel choices by leveraging autonomous vehicles within integrated public transport and sharing services rather than standalone ownership models to achieve sustainable mobility outcomes. | |
| Acheampong & Siiba | 2020 | Modelling the determinants of car-sharing adoption intentions among young adults: the role of attitude, perceived benefits, travel expectations and socio-demographic factors | Transportation | Ghana | Quantitative cross-sectional survey | Online questionnaire (young adults aged between 18 and 35 years) | Structural Equation Modeling (SEM) | The study found positive attitudes toward car-sharing among young adults in Ghana, with perceived benefits, pro-technology attitudes, driver's license possession, and prior Uber experience predicting adoption intentions. | Highlights the importance of integrating car-sharing within comprehensive MaaS platforms rather than standalone services, particularly where dissatisfied public transit users may shift to low-occupancy car-sharing instead of improved collective transport. | |
| Aguilera-García et al. | 2022 | Behavioral factors impacting adoption and frequency of use of carsharing: A tale of two European cities | Transport Policy | Spain, Germany | Quantitative cross-sectional survey | Survey campaign (two differnet survey) | Latent Psychological Constructs Identification (Factor Analysis); Generalized Structural Equation Model (GSEM) | Free-floating carsharing attracted young, wealthy, educated males in dense urban areas, with variety-seeking and sharing-oriented individuals showing higher adoption, while pro-environmental attitudes unexpectedly correlated with lower usage. | Suggests free-floating carsharing should account for city-specific adoption patterns and psychological factors like variety-seeking behavior, while addressing the paradox that environmentally-conscious users may avoid carsharing. | |
| Ali et al. | 2025 | Modelling the mode choice behaviour of Mobility-as-a-Service (MaaS) users in the Solent of the UK | Transportation Research Interdisciplinary Perspectives | UK | Quantitative cross-sectional survey | Revealed preference survey (two parts: socio-economic background; Frequent transport mode usage) | Multinomial Logistic Regression (MLR) | successful MaaS implementation requires targeted bundling strategies, discounted passes, and better integration of shared modes to shift car owners toward sustainable travel behavior. | Highlight how MaaS can be optimized through integration, affordability, accessibility, and targeted incentives to reduce car dependency and support inclusive, sustainable mobility. | |
| Alyavina et al. | 2024 | Mobility-as-a-Service and unsustainable travel behaviour: Exploring the car ownership and public transport trip replacement side-effects of the MaaS paradigm | Transport Policy | UK | Quantitative cross-sectional survey | Online self-administered survey | Statistical approach (Exploratory Factor Analysis (EFA); Ordinal Logistic Regression) | The study found that while MaaS is attractive to users, it often leads to substituting public transport with shared cars rather than reducing private car ownership. | Highlights a sustainability risk that needs mitigation in MaaS policy design. | |
| Alyavina et al. | 2020 | Mobility as a Service and Sustainable Travel Behaviour: A Thematic Analysis Study | Transportation Research Part F: Traffic Psychology and Behaviour | UK | Qualitative research design | Semi-structured interviews (40 individuals) | Thematic analysis approach | The study found that while MaaS was viewed positively, participants remained strongly car-dependent due to trust issues, human-related concerns, cost perceptions, and the irreplaceable symbolic and practical value of private cars. | Suggests MaaS adoption will require not only technical improvements and incentives but also strategies addressing psychological attachment to cars, digital trust, safety, and affordability to foster real behavioral change. | |
| Bartling | 2023 | Bike share and user motivation: exploring trip substitution choices among bike share users in a North American city | International Journal Of Sustainable Transportation | USA | Quantitative cross-sectional survey | Intercept survey | Binomial logistic regression models | The use of bike share systems is primarily driven by convenience, exercise, and cost savings; bike share often substitutes for less carbon-intensive modes such as walking and public transit rather than private cars. | Highlights how new mobility services like bike share can influence sustainable travel behaviour by shaping people’s mode choices through perceived convenience and affordability. | |
| Berg et al. | 2019 | Comfort First! Vehicle-Sharing Systems in Urban Residential Areas: The Importance for Everyday Mobility and Reduction of Car Use among Pilot Users | Sustainability | Sweden | Qualitative research design | Semi-structured interview (individuals living in the studied neighborhood, complemented by travel diaries) | Content analysis approach | The study found that VSS can reduce car use, especially among non-car owners, but everyday space-time constraints, particularly for parents and full-time workers can limit adoption, as convenience and comfort still favor private cars. | Effective sustainable mobility transitions need combined “soft” (VSS) and “hard” (parking restrictions, car-free zones) policy measures integrated with urban planning to address structural barriers to behavior change. | |
| Campbell & Brakewood | 2017 | Sharing riders: How bikesharing impacts bus ridership in New York City | Transportation Research Part A-Policy And Practice | USA | longitudinal quasi-experimental study | Bus data; Bikeshare data; other addition data | Difference-in-differences regression model | Bikesharing implementation causes significant bus ridership reduction (2.42% per thousand bikeshare docks), with 50-70% of bikeshare trips potentially substituting previous bus trips. | Provides quantitative evidence for transportation planners to design integrated multimodal systems and coordinate sustainable transport networks. | |
| Cantelmo et al. | 2022 | Aligning users' and stakeholders' needs: How incentives can reshape the carsharing market | Transport Policy | Denmark, Germany, Israel | Mixed Method | Secondary dataset; semi-structured interviews with industry experts | Qualitative analysis (thematic analysis); Quantitative validation (descriptive analysis) | Car clubs in London reduced car ownership by 38% with minimal impact on sustainable travel modes, but faced provision imbalances favoring dense inner boroughs and coordination challenges between operators and local authorities. | Car sharing development requires coordinated governance across boroughs, unified operating standards, and strategic expansion to outer areas while Leveraging technology and access-based consumption trends to maximize sustainable transport integration. | |
| Ceccato et al. | 2023 | MaaS Adoption and Sustainability for Systematic Trips: Estimation of Environmental Impacts in a Medium-Sized City | Sustainability | Italy | Quantitative cross-sectional survey | Mobility survey (Revealed-Preferences (RP); Stated-Preferences (SP)); socioeconomic data | Mixed logit model | Careful consideration of service design, including cost and the specific combination of modes, is essential to maximize adoption and achieve significant environmental benefits without inadvertently shifting users from existing sustainable modes. | Underscores the importance of MaaS bundle composition and pricing for sustainability outcomes. | |
| Charoniti et al. | 2021 | Intrapersonal heterogeneity in car-sharing decision-making processes by activity-travel contexts: A context-dependent latent class random utility - random regret model | International Journal of Sustainable Transportation | Netherlands | Stated choice experiment | Two-phase online stated choice experiment | Maximum simulated likelihood method | Car-sharing adoption varies with choice context and activity duration, with uncertain travel times and time pressure reducing acceptance, suggesting policy expectations about sustainable transport contributions may be overly optimistic. | The effectiveness depends on tailoring policies and service design to diverse contexts and user behaviours rather than assuming uniform appeal. | |
| Chou et al. | 2024 | Determining the role of self-efficacy in sustained behavior change: An empirical study on intention to use community-based electric ride-sharing | Transportation Research Part A-Policy And Practice | Thailand | Quantitative cross-sectional survey | Online survey | Structural Equation Modeling (SEM) | The study found that travel-related self-efficacy mediated sustained intention to use community-based electric ride-sharing in Thailand, with trust, eudaimonic value, and hedonic attitudes as key drivers, though intention decreased when payment was required. | Demonstrates that successful MaaS implementation for sustainable travel behavior requires building user self-efficacy through trustworthy, enjoyable service experiences and affordable pricing structures | |
| Clewlow | 2016 | Carsharing and sustainable travel behavior: Results from the San Francisco Bay Area | Transport Policy | USA | Quantitative cross-sectional survey | California Household Travel Survey (CHTS). | Statistical tests | Carsharing members showed significantly more sustainable travel patterns with 41.5% car trips versus 61.8% for non-members, fewer household vehicles in dense areas. | Demonstrates that carsharing within MaaS can effectively promote comprehensive sustainable mobility by reducing both car ownership and use while encouraging multimodal travel and clean vehicle adoption. | |
| Curtale & Liao | 2023 | Travel preferences for electric sharing mobility services: Results from stated preference experiments in four European countries | Transportation Research Part C: Emerging Technologies | France, Italy, Netherlands, Spain | Quantitative cross-sectional survey (Stated preference (SP) experiment ) | Online survey (two main parts: current transport modes; Stated Preference Experiment) | scaled error component multinomial logit (EC-MNL) model | The study found that electric shared mobility services (e-scooters and e-bikes) often substitute sustainable transport modes like public transport and active mobility rather than private cars, potentially increasing rather than reducing emissions due to lifecycle environmental costs. | A key challenge for MaaS sustainability is avoiding competition with existing sustainable transport, requiring strategic targeting of car users and supportive policies to ensure shared mobility contributes positively to environmental goals. | |
| Czarnetzki & Siek | 2023 | Decentralized mobility hubs in urban residential neighborhoods improve the contribution of carsharing to sustainable mobility: findings from a quasi-experimental study | Transportation | Germany | Quasi-experimental study | Web survey | Descriptive-statistical methods and statistical hypothesis testing | The study found that regular use of decentralized mobility hubs within 200m significantly reduced car ownership and increased sustainable transport among carsharing users, while infrequent users showed no significant differences from non-hub users. | Shows that strategically located mobility hubs can amplify shared services' sustainable benefits by reducing car dependency, providing a model for integrating MaaS platforms with urban planning to maximize environmental impact. | |
| Derikx & van Lierop | 2021 | Intentions to Participate in Carsharing: The Role of Self- and Social Identity | Sustainability | Germany | Quantitative cross-sectional survey | In-person intercept questionnaires | Structural Equation Modeling (SEM) | The study found that social pressure and technological self-identity predicted carsharing intentions more strongly than perceived control, while satisfaction with current sustainable travel reduced interest in carsharing. | Highlights that MaaS should target tech-savvy users through social influence, positioning carsharing as a car-replacement rather than a competitor to sustainable modes to maximize environmental benefits. | |
| Eccarius & Lu | 2020 | Adoption intentions for micro-mobility – Insights from electric scooter sharing in Taiwan | Transportation Research Part D: Transport and Environment | China | Quantitative cross-sectional survey | Pen-and-paper survey (Paper questionnaires) | Partial Least Squares Structural Equation Modeling (PLS-SEM); descriptive statistics and multi-group analysis (MGA) | Perceived compatibility with transport needs and values had the largest effect on electric scooter sharing intention, with environmental values playing indirect motivating roles and younger users (18-20 years) showing greater openness to adoption. | Promots e-scooter sharing requires removing routine-compatibility barriers, targeting younger users at transition points, and discouraging private ownership through policy. | |
| Farahmand et al. | 2021 | Mobility-as-a-Service as a transport demand management tool: A case study among employees in the Netherlands | Case Studies on Transport Policy | Netherlands | Stated choice experiment | Online questionnaires survey | Mixed logit models | Train and car-sharing attributes, along with price and parking tariffs, significantly influence commuting mode choice; young and low-income employees show greater willingness to change modes through MaaS, while older, high-income car users are more resistant to switching from private vehicles to alternative transport modes. | Provides important real-world evidence for MaaS effectiveness and commercial viability, directly informing bundle design and pricing strategies for sustainable transport policy. | |
| Feneri et al. | 2022 | Modeling the effect of Mobility-as-a-Service on mode choice decisions | Transportation Letters-The International Journal of Transportation Research | Netherlands | Stated choice experiment (Stated adaptation experiment) | Four-part online questionnaire (screening; travel diary; stated adaptation experiment; socio-demographics and attitudes) | Error Components Logit (ECLogit) model | Bundle design with combined monthly fees and mode-specific discounts influences MaaS usage more than price alone, with current car users showing higher willingness to switch modes than expected compared to walkers/bikers. | Provides insights for MaaS bundle design and mode switching behavior that can inform sustainable transportation policy, though requires combination with subscription demand studies for complete market impact assessment. | |
| Gomez et al. | 2020 | Adoption and frequency of use of ride-hailing services in a European city: The case of Madrid | Transportation Research Part C: Emerging Technologies | Spain | Quantitative cross-sectional survey | Survey campaign (two survey waves) | Multi-stage process: Latent Psychological Constructs; Generalized Heterogeneous Data Model (GHDM); Analysis Focus | Ride-hailing in Madrid attracted young, educated, wealthy users and primarily substituted car-oriented trips (60%) but also captured significant demand from public transport and active modes, particularly for leisure and errand activities during weekends. | Suggests that environmental awareness can limit adoption of less sustainable MaaS components. | |
| Gkartzonikas et al. | 2025 | Analyzing young people's behavioral intention on using demand-responsive transportation and ride-matching apps | Journal of Urban Mobility | Cyprus | Quantitative cross-sectional survey | Online survey (developed and distributed to students) | Discrete choice modeling | This study found that female students, people with limited vehicle access, and those living in smaller households are more likely to use demand-responsive transportation (DRT) services and ride-matching apps, with incentives and integration with public transport being key factors for promoting adoption among young people. | Ride-hailing services require careful regulation to maximize benefits (reducing parking demand, enhancing accessibility) while minimizing negative impacts on public transport ridership and active mobility, particularly through pricing strategies and service integration approaches. | |
| Gonzalez-Sanchez et al. | 2024 | Exploring determining factors of MaaS app use and its potential effects on mobility behavior: Keys to gender-sensitive planning and management | Transport Policy | Spain | Quantitative cross-sectional survey | Large-scale online survey (revealed and stated preferences) | four-step methodological procedure (Exploratory Factor Analysis (EFA); Confirmatory Factor Analysis (CFA); Structural Equation Model (SEM);Gender-sensitive analysis ) | The study found that technophilia, perceived usefulness, and perceived ease of use were key drivers of MaaS adoption intention, with significant gender differences - men showed stronger technophilia effects while women had higher overall adoption intentions and greater sensitivity to ease of use factors. | Demonstrates that successful MaaS implementation requires gender-sensitive design and marketing strategies, targeting technological skill development for women while emphasizing intuitive interfaces for men. | |
| Hartl et al. | 2018 | “Sustainability is a nice bonus” the role of sustainability in carsharing from a consumer perspective | Journal of Cleaner Production | Austria | Mixed Method | Three distinct studie (quantitative, cross-sectional design; quantitative experimental design; qualitative, exploratory interview) | MANOVA; t-tests; template analysis | The research shows that while carsharing is generally perceived as more environmentally friendly than car ownership, most users choose business-to-consumer services for reasons of cost and trust, whereas sustainability concerns matter more for peer-to-peer carsharing | Suggests that MaaS platforms aiming to foster sustainable travel may need to emphasize functional value such as price and reliability while recognizing that environmental motives influence only certain segments of users. | |
| Hasselwander et al. | 2022 | Towards sustainable transport in developing countries: Preliminary findings on the demand for mobility-as-a-service (MaaS) in Metro Manila | Transportation Research Part A: Policy and Practice | Philippines | Quantitative cross-sectional survey | Pre-survey; web-based survey | Hybrid choice model (HCM) | The study found high MaaS acceptance (84%) in Metro Manila, with MaaS potentially increasing public transport attractiveness and promoting modal shift toward sustainable transport, though environmental awareness was not a significant adoption factor. | Shows potential to foster sustainable travel in developing countries by using technology familiarity to enhance reliability and multimodality, but inclusive design is needed to support lower-income groups lacking internet access yet most in need of better mobility. | |
| Haustein & Kroesen | 2022 | Shifting to more sustainable mobility styles: A latent transition approach | Journal of Transport Geography | Denmark | Longitudinal survey (2.5 years) | Three-wave survey (baseline; 1-year; 2-year follow-up) | Longitudinal panel data analysis | Five mobility styles identified with car-reliant groups dominating (44%) despite good cycling/transit access; transitions favor car dependency over sustainable modes, with car sharing showing minimal impact on mobility style changes. | Demonstrates challenges of sustainable mobility transitions. | |
| Henderson et al. | 2022 | Access-Based Consumption, Behaviour Change and Future Mobility: Insights from Visions of Car Sharing in Greater London | Future Transportation | UK | Mixed Method | Second data (club members); semi-structured interviews | Quantitative Analysis; Qualitative analysis (thematic analysis) | Car club membership reduced private car ownership by 38% while only minimally decreasing sustainable transport use by 2-3%. | Demonstrates that car sharing promotes sustainable travel by reducing private car dependency without undermining public transport usage. | |
| Hensher et al. | 2021 | Mobility as a service and private car use: Evidence from the Sydney MaaS trial | Transportation Research Part A: Policy and Practice | Australia | Field trial (Sydney MaaS field trial: 2-year project) | Mixed Method (Quantitative: Pre-trial online surveys; Revealed preference data; GPS tracking data; Post-trial surveys; Qualitative: Pre- and post-trial interviews) | Joint discrete-continuous model system (the discreate choice model and the count model) | Subscription bundles can statistically influence private car use compared to PAYG, however, financial incentives appear essential for multimodal subscription adoption, and effects depend on specific bundle design and participant characteristics. | Provides empirical evidence of MaaS bundle impact on car dependency, with findings on financial incentives that inform both commercial design requirements and policy frameworks for sustainable transport. | |
| Hjorteset & Böcker | 2020 | Car sharing in Norwegian urban areas: Examining interest, intention and the decision to enrol | Transportation Research Part D: Transport and Environment | Norway | Quantitative cross-sectional survey | Web-based and self-administered questionnaire | Structural Equation Modeling (SEM) | Car sharing adoption is influenced by car ownership, environmental consciousness, sociodemographics, and urban density, with car owners and younger, educated urban residents showing higher adoption, while financial and social factors have limited effects. | highlights the need to make car sharing visible, accessible, and coordinated with urban mobility strategies, targeting specific demographics and leveraging restrictions on car use to encourage adoption as an alternative to private car ownership. | |
| Ho | 2022 | Can MaaS change users’ travel behaviour to deliver commercial and societal outcomes? | Transportation Research Part A: Policy and Practice | Austalia | Secondary analysis of field trial data (Sydney MaaS trial) | Multi-source datasets from five-month Sydney MaaS trial (app usage tracking, subscription records, pre-trial surveys, GPS car tracking via Safer Journeys program) | Two-step model system (Discrete choice model for bundle selection; Count models for trip/km demand) | MaaS subscription bundles reduced private car use by 38.89 km/person/month while increasing shared mobility usage and achieving 3kg CO2 reduction per dollar of financial incentive; GreenPass and SuperSaver25 bundles benefited Uber/taxi providers more than public transport providers. | Provides evidence for MaaS effectiveness and commercial viability, and informs bundle design and pricing strategies for sustainable transport policy. | |
| Hou et al. | 2025 | Qualitative insights into travel behavior change from using private cars to shared cars | International Journal of Sustainable Transportation | UK | Qualitative research design | Six focus groups (30 participants in four phases: pre-decisional; pre-actional; actional and post actional) | Two-step process (Transcription and Content Analysis); Deductive and Inductive Coding | The study reveals that the transition from private car use to carsharing is a phased behavioral process shaped by financial costs, environmental concerns, pricing models, customizability, and the evolving role of SAVs, with adoption influenced by both universal and context-specific factors. | Guides policymakers and service providers to design targeted, phase-sensitive interventions—such as optimized pricing, incentives, integration with public transport, and enhanced user experience—to foster broader adoption of carsharing and sustainable mobility. | |
| Jang et al. | 2021 | Does MaaS contribute to sustainable transportation? A mode choice perspective | International Journal of Sustainable Transportation | Netherlands | Stated portfolio choice experiment | Web-based survey (monthly subscription fee, time commitment, and data required for registration) | Mixed logit model | The study shows that the sustainability impact of MaaS is ambiguous, since some users may replace private cars with bundles centred on public and active transport, while others may shift away from these modes by opting for bundles that include car rental or carsharing. | Suggests that MaaS can shape sustainable travel behaviour in both positive and negative ways, depending on the kinds of modal transitions it encourages within different urban and policy contexts. | |
| Julsrud & Farstad | 2020 | Car sharing and transformations in households travel patterns: Insights from emerging proto-practices in Norway | Energy Research & Social Science | Norway | Mixed Method | Web-based survey and in-depth qualitative interviews | Three general steps (Pilot Study (Pre-analysis); Parallel Data Gathering; Integrated Data Analysis) | Car sharing has developed in three forms: active green, which reflects car-free living; local flexible, which supplements car ownership; and long-distance holiday, which focuses on weekend and vacation use. The latter two forms are expanding and may increase overall car travel rather than reduce it. | For carsharing to foster sustainable mobility, platforms should encourage car-replacement practices through supportive policies, as the impact of sharing models on sustainability depends on how they are designed and promoted. | |
| Kawgan-Kagan | 2015 | Early adopters of carsharing with and without BEVs with respect to gender preferences | European Transport Research Review | Germany | Quantitative cross-sectional survey | Online survey | Descriptive statistics; comparative analysis; factor analysis | The study found that female early adopters of carsharing showed different patterns than males, preferring electric vehicles for practical urban mobility and facing unaddressed barriers when traveling with children. | MaaS platforms must expand beyond male early adopters by offering gender-specific features and marketing, addressing women’s needs for family-friendly options and EV preferences to broaden sustainable mobility adoption. | |
| Kopplin et al. | 2021 | Consumer acceptance of shared e-scooters for urban and short-distance mobility | Transportation Research Part D: Transport and Environment | Germany | Quantitative cross-sectional survey | Online survey | Partial Least Squares Structural Equation Modeling (PLS-SEM) | The study found that e-scooters primarily replace walking rather than motorized transport, with entertainment and convenience motivating use more than environmental benefits, while owners showed lower safety concerns and higher hedonic motivation than non-owners. | MaaS design should position e-scooters to complement walking and cycling while targeting car users through specific incentives to achieve genuine environmental benefits. | |
| Lavieri et al. | 2017 | Modeling Individual Preferences for Ownership and Sharing of Autonomous Vehicle Technologies | Transportation Research Record | USA | Quantitative cross-sectional survey | Regional Travel Study (Individuals younger than 18 years old) | Generalized Heterogeneous Data Model (GHDM) | The study found that green lifestyles, technological savviness, youth, education, and urban residence increase adoption of shared mobility and autonomous vehicles (AVs), with vehicle owners favoring AV ownership, non-owners preferring sharing, and neighborhood density promoting shared AV use. | User segments already drawn to shared mobility are likely to adopt AVs, suggesting MaaS should target green, tech-savvy users and promote densification to favor shared over owned AVs, while mitigating risks of substituting active and public transport. | |
| Liu et al. | 2023 | Understanding the impact of occasional activities on travelers’ preferences for mobility-as-a-service: A stated preference study | Travel Behaviour and Society | China | Quantitative cross-sectional survey (Stated preference (SP) experiment ) | Online survey (four parts: socio-demographic features, commute travel information, stated preference questions, and lottery games) | Two stages (Constant Relative Risk Aversion (CRRA); mixed logit models) | The study found that MaaS can encourage multimodality, but risk-averse travelers prioritize faster modes like taxis for uncertain activities, suggesting shifts may not always favor sustainable transportation. | while MaaS can increase multimodality, it also creates a risk of encouraging a shift from sustainable modes like public transit to less sustainable ones like taxis, especially when users need flexibility for unexpected trips. | |
| Lopez-Carreiro et al. | 2020 | Urban mobility in the digital era: An exploration of travellers' expectations of MaaS mobile-technologies | Technology in Society | Spain | Qualitative, exploratory approach | Focus groups (FGs) (recruit from the university) | Thematic analysis | The study finds that travellers, especially younger groups, see MaaS mobile technologies as capable of reshaping daily mobility through personalization and real-time information, but broad adoption also requires cultural change, education, and active involvement of citizens. | Highlights that MaaS can foster more sustainable travel habits not just through technological design, but by embedding it in social processes that build trust, shared responsibility, and readiness to shift away from car ownership. | |
| Matyas & Kamargianni | 2019 | The potential of mobility as a service bundles as a mobility management tool | Transportation | UK | Quantitative cross-sectional survey | Stated preference survey, socio-demographic questionnaire | Mixed logit choice model | Even though respondents do not prefer shared modes in MaaS plans, 22% would still subscribe to plans including these modes, and 64% indicated willingness to try previously unused transport modes if included in their plans. | Provides evidence that MaaS subscription bundles can serve as mobility management tools to promote shared mode adoption, demonstrating the potential for bundling to overcome initial mode preferences and encourage sustainable travel behavior experimentation. | |
| Mavlutova et al. | 2021 | Does car sharing contribute to urban sustainability from user-motivation perspectives? | Sustainability | Latvia | Quantitative cross-sectional survey | Online questionnaire survey | Descriptive statistics and Chi-squared tests | The study found that economic benefits were the primary motivators for car-sharing adoption among Latvian users over environmental concerns, with younger generations, particularly males, showing greater preference for shared access over ownership. | Demonstrates that MaaS platforms should prioritize economic value propositions over environmental messaging when promoting car-sharing services, while targeting younger male demographics who are more receptive to access-based mobility models. | |
| Militão et al. | 2025 | Mobility-as-a-service and travel behaviour change: How multimodal bundles reshape our travel choices | Transportation Research Part A: Policy and Practice | Australia | Secondary analysis with data reconstruction (Sydney MaaS trial) | Sydney MaaS trial data (5-month tracking device data) and TripGo API data for data enrichment | Error Components-Random Parameter Logit Model | Multimodal mobility bundles alter subscriber travel behavior by lowering private car probability and increasing probability of choosing other modes offered within bundles. | Demonstrates MaaS potential to facilitate multimodal journeys and reduce private car use through well-designed subscription bundles | |
| Mitropoulos et al. | 2024 | An Evaluation and Prioritization Framework for Pilot First- and Last-Mile Ridesharing Services | Sustainability | Greece | Field trail/ experiment (Pilot Ridesharing Demonstration) | Surveys; ridesharing application data | Quantifying KPIs, estimating CO2 reductions, and analyzing stakeholder priorities (Analytical Hierarchy Process (AHP)) | The ridesharing service achieved 59% usability rate exceeding targets and demonstrated potential to increase public transport ridership through seamless integration addressing first- and last-mile challenges, despite COVID-19 implementation limitations and shorter demonstration duration. | Ridesharing with public transport can effectively solve connectivity gaps and boost transit ridership, but require overcoming technological barriers, building user trust through incentives, and allowing sufficient demonstration periods to establish regular usage patterns among commuters. | |
| Mouratidis | 2022 | Bike-sharing, car-sharing, e-scooters, and Uber: Who are the shared mobility users and where do they live? | Sustainable Cities and Society | Norway | Quantitative cross-sectional survey | Online survey; GPS data | Descriptive statistics; Binary Logistic Regression Modeling | Different shared mobility options attracted distinct user profiles - younger people preferred bike-sharing, e-scooter sharing, and Uber; males dominated micromobility; higher-income residents used car-sharing and Uber; and climate-concerned citizens favored bike-sharing while avoiding Uber. | Requires tailored integration strategies and targeted policies to address gender inequities and ensure accessibility across income levels rather than treating shared mobility as a homogeneous service category. | |
| Mostofi | 2022 | The frequency use and the modal shift to ICT-based mobility services | Resources Environment and Sustainability | Egypt | Quantitative cross-sectional survey | Online survey (two sections: socioeconomic parameters and travel behaviors) | Ordinal logistic regression; Multinomial logistic regression | The study found that ridesourcing in Cairo primarily replaces traditional taxis and private cars (sustainable impacts) but also substitutes public transport (unsustainable impact), with women, higher-income individuals, and car owners being more frequent users. | Highlights the dual sustainability challenge for MaaS platforms in integrating ridesourcing services - while they can reduce private vehicle dependency, they risk cannibalizing public transport usage | |
| Nikitas | 2018 | Understanding bike-sharing acceptability and expected usage patterns in the context of a small city novel to the concept: A story of ‘Greek Drama’ | Transportation Research Part F: Traffic Psychology and Behaviour | Greece | Quantitative cross-sectional survey | Online survey; in-site questionnaires | Descriptive analysis; ordinal regression Model | The study found high public support for bike-sharing despite low cycling culture, with safety concerns and infrastructure gaps as main barriers, though cycling was viewed more recreationally than as practical transport. | Demonstrates that shared mobility can gain acceptance in car-dependent environments, suggesting MaaS platforms could leverage public support while addressing infrastructure and safety barriers to shift from recreational to utilitarian use. | |
| Poslad et al. | 2015 | Using a smart city IOT to incentivise and target shifts in mobility behaviour—Is it a piece of pie? | Sensors | Netherlands, UK | Mixed-methods quasi-experiment | System development and internal evaluation; user recruitment; Living Lab experiments | Quantitative analysis and qualitative analysis | The study concludes that incentives can encourage people to adjust travel behaviour, especially when they are personalised and context-aware, but shifting from cars to public transport proved difficult. | Suggests that platforms seeking to foster sustainable mobility may benefit from integrating personalised, technology-supported incentives, though their effectiveness depends on timing, user context, and overcoming resistance to mode shifts. | |
| Ramos & Bergstad | 2021 | The Psychology of Sharing: Multigroup Analysis among Users and Non-Users of Carsharing | Sustainability | Italy, Sweden | Quantitative cross-sectional survey | Online survey (four different groups) | Structural Equation Modeling (SEM); Multigroup Confirmatory Factor Analysis (MGCFA) | Control and subjective norms strongly predict intention to use carsharing, while driving habits and limited environmental concern act as barriers, with cultural differences influencing the role of trust and climate morality. | Understanding these psychological and cultural factors can guide the design, promotion, and adoption strategies of carsharing services and identify barriers to initial uptake. | |
| Reck et al. | 2021 | Multimodal Transportation Plans: Empirical Evidence on Uptake, Usage and Behavioural Implications from the Augsburg MaaS Trial | Transportation Research Board | Germany | Field trail (19 months MaaS trial by swa Augsburg) | Mobil-flat subscriber registry; Trip-level carsharing booking data | Descriptive statistics; mixed effects regression modeling | The Augsburg MaaS trial showed substantial initial uptake but market saturation signs, with carsharing allowance underutilization, higher consumer than producer financial gains, and complex sustainability implications where increased carsharing usage could substitute either private cars or public transport. | MaaS bundles can effectively increase shared mobility usage but require refined design and pricing models to ensure economic viability while directing modal shifts toward genuinely sustainable outcomes rather than simply replacing existing sustainable transport options. | |
| del Rey-Merchan & Lopez-Arquillo | 2022 | Carpooling Systems for Commuting among Teachers: An Expert Panel Analysis of Their Barriers and Incentives | International Journal of Environmental Research and Public Health | Spain | Quantitative cross-sectional survey | Multi-round process with an expert panel | Qualitative and focused on identifying consensus among the expert panel (three phases) | Teachers identified cost savings as the main carpooling incentive, but psycho-social barriers (personal and social factors) outweighed benefits, with women showing greater concerns about sharing with different-gender coworkers compared to men. | Highlights that MaaS platforms integrating carpooling services must address gender-specific safety concerns and psycho-social barriers through targeted solutions like gender-separated options and institutional matching systems, rather than relying solely on economic incentives to drive adoption. | |
| Roig-Costa et al. | 2025 | Unpacking the docked bike-sharing experience. A bike-along study on the infrastructural constraints and determinants of everyday bike-sharing use | Journal of Transport Geography | Italy | Qualitative research design | Two methods (mobile interviews; Static interview) | Two stages (observation of videotaped trips; thematic analysis) | The study shows that users’ perceptions of docked bike-sharing are strongly shaped not only by traffic safety and cycling infrastructure but also by station design, location, and reliability, which collectively influence satisfaction and perceived safety. | Stresses that to expand bike-sharing use and equity, policies must address both safe cycling infrastructure and well-designed, reliable docking stations that foster trust, comfort, and inclusivity. | |
| Sener et al. | 2023 | Driving sustainable transportation: insights and strategies for shared-rides services | Sustainability: Science, Practice and Policy | USA | Quantitative cross-sectional survey | online survey (shared mobility survey) | Descriptive Statistics; inferential statistics; binary logistic regression model; additional descriptive analysis | The study found that while transportation network companies (TNCs) like ride-hailing have increased vehicle miles traveled and congestion, pooled/shared-ride services present a potential solution, though low awareness of available services and concerns about comfort and safety remain barriers to adoption. | Demonstrates that MaaS platforms must prioritize shared mobility and user education while implementing policies to encourage ride-sharing, as individual ride-hailing may undermine sustainable transportation goals. | |
| Shao & Liang | 2019 | An analysis of the factors influencing the sustainable use intention of urban shared bicycles in China | Sustainability | China | Quantitative cross-sectional survey | Online questionnaire survey | Model fit; correlation analysis, and regression analysis | Extended TAM model showed perceived usefulness, ease of use, innovation, and social norms predicted sustainable bike-sharing use intention, with air quality as a moderating factor. | Bike-sharing integration should balance user-friendly interfaces with behavioral enforcement to promote sustainable usage without deterring users. | |
| Si et al. | 2024 | Are you a happy traveler? Exploring ridesourcing travelers' satisfaction and subjective well-being | Transportation Research Part D: Transport and Environment | China | Quantitative cross-sectional survey | Online questionnaire survey (pre-questionnaires; system screening) | Partial Least Squares Structural Equation Modeling (PLS-SEM); multigroup comparison methods | Driver competence influenced ride-sourcing satisfaction, with platform safety particularly important for women, environmental concern moderating satisfaction-wellbeing relationships, and order matching efficiency being more critical for shared versus non-shared rides. | Suggests ride-sourcing services should prioritize driver quality and safety features while recognizing gender-specific preferences, optimizing matching algorithms for shared rides, and leveraging environmental messaging to enhance user satisfaction and wellbeing across different demographic segments. | |
| Simancas et al. | 2024 | Decision-making in open carpooling programs: Perspectives of drivers versus passengers | Travel Behaviour and Society | Colombia | Quantitative cross-sectional survey | Online survey: Universidad de los Andes Campus Travel Survey (UCTS) (focus on students) | Integrated choice and latent variable model (ICLV). | The study found that drivers in university carpool programs are motivated by sustainability and profit incentives while passengers prioritize convenience and car-dependency solutions, with convenience being particularly important for women passengers. | Demonstrates that successful carpooling integration within MaaS requires differentiated strategies for drivers versus passengers, with targeted incentives addressing distinct motivational factors while considering potential substitution of sustainable transport modes. | |
| Sochor et al. | 2016 | Trying Out Mobility as a Service Experiences from a Field Trial and Implications for Understanding Demand | Transportation Research Record | Sweden | Field trail (UbiGo trial: 6-month) | Mixed Method (before-during-end and follow-up questionnaire; surveys, interviews, diaries, usage data) | Quantitative Analysis and Qualitative Analysis | UbiGo trial demonstrates MaaS potential to change travel behavior through service-focused design emphasizing customization and flexibility, with success depending on addressing user needs rather than technology integration alone. | Provides empirical evidence of MaaS design effectiveness and user acceptance. | |
| Sochor et al. | 2015 | An Innovative Mobility Service to Facilitate Changes in Travel Behavior and Mode Choice | 22nd ITS World Congress | Sweden | Field trail (UbiGo trial: 6-month) | Mixed methods (before-during-after questionnaires, interviews, focus groups, travel diaries) | Quantitative Analysis and Qualitative Analysis | All four user groups with different car ownership patterns (“shedders,” “keepers,” already carsharing, and “accessors”) shifted toward more sustainable transport modes during the UbiGo trial, with high satisfaction rates and no significant differences between groups despite their varied starting situations. | Demonstrates that MaaS requires holistic, personalized approaches, as different user groups have varying needs, informing the importance of integrated services and multi-stakeholder cooperation for sustainable transport transitions. | |
| Steffen et al. | 2024 | Improving interest in public, active, and shared travel modes through nudging interventions | Transportation Research Part F: Traffic Psychology and Behaviour | Belgium | Quasi-experimental study | Online survey (Pre-nudge; Post-nudge) | Statistical tests (Paired Sample t-tests; Independent Sample t-tests; ANOVA Mean-Comparison Tests; Multiple Linear Regression Models) | The study found that moral nudging was particularly effective for increasing carsharing interest while norm nudging was more effective for active travel and public transport, with women and younger individuals showing greater susceptibility to moral arguments for sustainable transport modes. | Demonstrates that MaaS platforms can leverage targeted messaging - using moral arguments for carsharing and social norm messaging for public transport - suggesting differentiated nudging approaches can enhance sustainable travel behavior change. | |
| Storme et al. | 2020 | Limitations to the car-substitution effect of MaaS. Findings from a Belgian pilot study | Transportation Research Part A: Policy and Practice | Belgium | 2.5-month pilot study/field trial | surveys (recruitment survey; three online travel surveys); application and mileage data | Descriptive statistics, qualitative analysis | Field trial shows MaaS reduces but cannot eliminate car use despite high incentives; participants achieved car-free commuting but retained cars for leisure/family trips, indicating complementary rather than substitutional relationship. | Provides critical real-world evidence challenging assumptions about MaaS car-substitution potential, informing realistic expectations for MaaS policy and highlighting limitations for sustainable transport transitions. | |
| Strömberg et al. | 2018 | Inviting travelers to the smorgasbord of sustainable urban transport: evidence from a MaaS field trial | Transportation | Sweden | Field trail (UbiGo trial: 6-month) | Mixed-methods approach (Questionnaires: ex-ante; in-itinere and ex-post; Interview) | Qualitative analysis (interviews); Quantitative analysis (questionnaires) | The UbiGo MaaS trial found that flexible pay-per-use pricing and an app presenting all transport options equally led participants to shift toward more sustainable transport choices by breaking travel habits and expanding perceived mobility options. | Demonstrates that MaaS design focused on behavioral intervention through interface design and pricing structure can effectively promote sustainable travel behavior change beyond simply bundling transport services. | |
| Suárez et al. | 2025 | User feedback assessment of region-focused mobility-as-a-service bundles | Multimodal Transportation | Portugal | Quantitative cross-sectional survey | Online survey (revealed and stated preferences ) | Four-step methodological procedure (Exploratory Factor Analysis (EFA); Confirmatory Factor Analysis (CFA); Structural Equation Model (SEM); Gender-sensitive analysis) | The study shows that technophilia, perceived usefulness, and perceived ease of use are the strongest predictors of MaaS adoption, with significant gender differences, like men more influenced by usefulness and technophilia, women more by ease of use, while green values and attitudes toward shared modes play secondary but notable roles. | Highlights the need for gender-sensitive design, digital skills programs, intuitive interfaces, and targeted communication strategies to foster broader, more equitable MaaS adoption and advance sustainable mobility. | |
| Suatmadi et al. | 2019 | On-demand motorcycle taxis improve mobility, not sustainability | Case Studies on Transport Policy | Indonesia | Quantitative cross-sectional survey | online survey (user experiences for ojek usage; one-day travel diary; personal information) | Compare travel choices (before-after use ojk); carbon footprint calculation | The study found that online ojek in Jakarta primarily replaced minibus services with mixed environmental impacts - reducing emissions for car-switchers but increasing them for public transport users, resulting in negligible overall GHG change. | MaaS implementation requires targeted strategies to shift high-emission car owners to shared services while protecting existing sustainable transport use among lower-income public transport users. | |
| Suchanek & Szmelter-Jarosz | 2019 | Environmental Aspects of Generation Y's Sustainable Mobility | Sustainability | Poland and countries in Central and Eastern Europe | Quantitative cross-sectional survey | Online survey (pilot study; main survey) | Descriptive statistics, exploratory factor analysis (EFA), and analysis of variance (ANOVA). | The study found that within Polish Generation Y, older cohorts showed more ecology-oriented transport attitudes than younger cohorts, with women displaying more eco-friendly attitudes than men, and non-drivers being more supportive of sustainable transport options including MaaS services. | suggests that successful sustainable mobility services should tailor messaging and features to different age cohorts within the same generation while leveraging gender differences and driving status to optimize user adoption strategies. | |
| Suchanek et al. | 2021 | Substitutability and Complementarity of Municipal Electric Bike Sharing Systems against Other Forms of Urban Transport | Applied Sciences | Poland | Quantitative cross-sectional survey | In-site interview using an 18-question questionnaire that was pre-tested with 12 local experts | Descriptive analysis; Logistic regression | The study found that the MEVO electric bike-sharing system primarily substituted public transport and walking rather than private cars, with women, younger users, and those living close to work/study destinations being more likely to substitute car trips. | demonstrates a critical challenge for MaaS platforms integrating electric bike-sharing - that these services may replace sustainable transport modes rather than reducing car dependency. | |
| Tran et al. | 2019 | Travelers’ Acceptance of Electric Carsharing Systems in Developing Countries: The Case of China | Sustainability | China | Quantitative cross-sectional survey | online survey (2 separate collection perionds for two data samples) | Structural Equation Modeling (SEM) | The study found that performance expectancy, effort expectancy, hedonic motivation, and familiarity with carsharing significantly shape behavioral intention to use electric carsharing, with hedonic motivation being the strongest predictor. | This highlights that MaaS adoption for sustainable travel depends not only on perceived environmental and functional benefits but also on ease of use, knowledge, and the enjoyment factor, which can guide strategies to encourage wider behavioral shifts. | |
| Vejchodská et al. | 2024 | Carsharing users’ behaviour and attitudes. The role of car availability in households | Transportation | Czech Republic | Quantitative cross-sectional survey | Electronic questionnaire (historical use database) | Descriptive statistics; comparative statistical tests (t-tests), and multinomial logistic regression. | Carsharing effectively reduces car ownership and use only when users dispose of their private cars, with car-free households showing greater environmental benefits and policy support compared to multi-car households who use carsharing to increase rather than reduce overall car use. | Shows that MaaS success in promoting sustainable travel requires targeting car-free users and combining service provision with restrictive car ownership policies, as shared mobility alone may expand rather than replace private vehicle access without complementary policy interventions. | |
| Vélez & Plepys | 2021 | Car sharing as a strategy to address ghg emissions in the transport system: Evaluation of effects of car sharing in Amsterdam | Sustainability | Netherlands | Quantitative, modeling approach | Secondary data (Mobility Data; Emission Data; Emission Factors) | Multi-step quantitative modeling process | Car sharing reduced emissions when car owners disposed vehicles and traveled less, but increased emissions when car-free individuals gained car access, with net positive city-level benefits requiring combined green technology and behavioral change policies. | Car sharing reduced emissions when car owners disposed vehicles and traveled less, but increased emissions when car-free individuals gained car access, with net positive city-level benefits requiring combined green technology and behavioral change policies. | |
| Wali & Khattak | 2022 | A joint behavioral choice model for adoption of automated vehicle ride sourcing and carsharing technologies: Role of built environment & sustainable travel behaviors | Transportation Research Part C: Emerging Technologies | USA | Quantitative cross-sectional survey | Behavioral and Socio-economic data; Built environment data | Joint behavioral model | The study concludes that people living in more walkable neighbourhoods and those already engaged in transit or shared mobility are more open to using automated carsharing and ride-sourcing, while strong safety concerns and higher age reduce willingness to adopt. | MaaS strategies linking shared automated services with walkable, transit-oriented environments could foster sustainable travel choices, though uptake will hinge on addressing safety perceptions and generational differences. | |
| Wali et al. | 2023 | Are californians willing to use shared automated vehicles (SAV) & renounce existing vehicles? An empirical analysis of factors determining SAV use & household vehicle ownership | Technological Forecasting and Social Change | USA | Quantitative cross-sectional survey | California Vehicle Survey (CVS) (three-phase questionnaires process) | Random parameter logit models | Travel satisfaction in ridesourcing is shaped by platform safety, car comfort, driver competence, and perceived environmental and social benefits, while demographic factors such as gender, travel mode, and education level moderate these effects. | Ride-sourcing services should optimize driver quality, safety features, and matching algorithms while using targeted environmental messaging to enhance satisfaction across demographic segments. | |
| Wang et al. | 2024 | Heterogeneous choice of personalized Mobility-as-a-Service bundles and its impact on sustainable transportation | Transportation Research Part D:Transport and Environment | China | Quantitative cross-sectional survey | Web-based questionnaires (historical travel behavior, SP experiment of MaaS bundles, and personal and household information) | Mixed logit model | The study found that differentiated MaaS bundles achieved 81% user acceptance in China, effectively reducing carbon emissions among private car users despite heterogeneous user preferences and willingness to pay. | Demonstrates that successful MaaS implementation requires user segmentation and tailored bundle design rather than one-size-fits-all approaches. | |
| Zawieska et al. | 2025 | Why not share it?-Understanding preferences for car sharing services in Warsaw, Poland | Case Studies on Transport Policy | Poland | Quantitative cross-sectional survey | Computer-assisted web survey (three parts: initial questions; Discrete Choice Experiment (DCE); debriefing questions) | Latent class (LC) modelling | The study found that providing additional information did not significantly change Warsaw residents’ carsharing preferences or usage intentions, though it increased positive attitudes toward social benefits, with willingness-to-pay strongly tied to convenience factors like free dedicated parking and differences emerging around BEV vs. ICE preferences. | Suggests that policy and service design for carsharing should focus less on information campaigns and more on improving service attributes (e.g., parking, convenience, vehicle options) while addressing demographic differences and resistance to electric vehicles. | |
| Zhang & Li | 2020 | Intention of Chinese college students to use carsharing: An application of the theory of planned behavior | Transportation Research Part F: Traffic Psychology and Behaviour | China | Quantitative cross-sectional survey | Online questionnaire (sociodemographic information; measurement Items) | Partial Least Squares (PLS) technique of Structural Equation Modeling (SEM) | Subjective norm is the strongest predictor of Chinese college students’ intention to use carsharing, followed by perceived behavioral control, while attitude and direct environmental concern have no significant effect, though environmental concern indirectly influences intention through norms and control. | Highlights the critical role of social influence and perceived control in promoting carsharing adoption among Chinese students and suggest that interventions should leverage peer networks and enhance users’ confidence and familiarity with the service. | |
| Zhou et al. | 2024 | Does Online Ride-Hailing Affect Car Purchasing Intention Under the Sharing Economy? | IEEE Transactions on Engineering Management | China | Quantitative cross-sectional survey | Online questionnaire survey | Partial Least Squares Structural Equation Modeling (PLS-SEM) | The study found that in China's sharing economy context, environmental awareness, perceived value, and perceived risk significantly influence car purchasing intentions through attitudes and subjective norms, with higher environmental awareness and ride-hailing satisfaction potentially reducing fuel car purchase intentions. | Suggests that well-designed shared mobility services within MaaS ecosystems can serve as viable substitutes for car ownership when they address user value perceptions and risk concerns. | |
| Grey materials | | | | | | | | | |
| ERTICO – ITS Europe | 2019 | The role of intelligent transport systems in sustainable urban mobility plans | ERTICO – ITS Europe | Belgium, Finland, France, Greece, Spain, Sweden, UK | Guidance document | Secondary data (e.g., EU Legal Framework; City Examples) | Synthesis of case studies and best practices | The report identified ITS as crucial infrastructure enabling user behavior change, multimodal information systems, smart ticketing, and data provision for sustainable transport planning, with MaaS explicitly recognized as a key ITS solution for reducing personal vehicle ownership. | ITS provides the technological backbone for MaaS by enabling seamless multimodal integration, smart payments, and data-driven insights that influence users toward sustainable shared mobility choices. | |
| Urban Mobility Partnership (UMP) | 2023 | Mobility as a Service: A practical guide | UMP | UK | Guidance document (synthesis of expertise, best practices, and conceptual frameworks) | Secondary data (e.g., the collective expertise and practical experience of the Urban Mobility Partnership's members) | Synthesis of case studies and best practices | The report defined MaaS as integrated transport services in single on-demand apps enabling multi-modal journey planning and payment, with potential to drive modal shifts towards sustainable travel through behavioral nudges, Mobility Credits schemes for scrapping polluting vehicles, and gamification techniques to reward good travel behavior. | MaaS influences sustainable travel by simplifying shared mobility access, rebuilding post-COVID trust, and creating incentive systems that shift users from private vehicles to shared and public transport. | |
| UITP – International Association of Public Transport | 2020 | Report on mobility as a service (MaaS) | UITP – International Association of Public Transport | Denmark, Sweden, UK, Belgium, Finland, Singapore, Austria, Germany, Spain | Synthesis and advocacy document | Secondary data (e.g., Reports and initiatives from various transport authorities and organizations; Examples of operational MaaS platforms and trials) | Synthesis of case studies and best practices | The report defined MaaS as integrating transport services into single digital offers based on active mobility and public transport to enable car-free living, like the UbiGo pilot demonstrating 50% private car reduction and 200% carsharing increase, though current implementations struggle to attract large numbers of former car owners | MaaS can effectively influence sustainable travel behavior by removing multimodal complexity and leveraging gamification strategies, but requires stronger integration of shared mobility services with robust public transport systems to overcome car ownership dependency and achieve widespread behavioral change. | |
| Institution of Engineering and Technology (IET) | 2021 | Could Mobility as a Service solve our transport problems? | IET | Denmark, Australia, Finland, France, Georgia, Germany, Italy, New Zealand, Spain, UK, USA | Desk-based review and conceptualization of the MaaS landscape | Secondary data (e.g., experience from a multidisciplinary MaaS Working Group; cases from around the world) | Synthesis of case studies and best practices | The report notes some challenges including user resistance to behavior change, digital literacy requirements excluding vulnerable populations, and institutional/commercial hurdles. | MaaS influences sustainable travel by making shared and public transport more attractive through integrated platforms and behavioral nudging, but requires addressing digital equity and positioning as complementary to private car ownership. | |
| United Nations | 2020 | Mobility as a Service: Transport trends and economics 2018-2019 | United Nations | Sweden, Denmark, UK, Germany, France, USA, China, Japan | Desk-based review and conceptualization of the MaaS landscape | Secondary data (e.g.,Reports from transport organizations) | Synthesis of case studies and best practices | The report defined MaaS as user-centric systems integrating transport modes for car-free mobility, highlighting shared mobility's environmental benefits while noting implementation challenges including over-regulation and economic sustainability requiring public-private collaboration. | MaaS can promote shared mobility and sustainable travel through digital integration and superior service alternatives, but requires stakeholder collaboration, supportive infrastructure, and sustainable business models to overcome regulatory barriers. | |
| International Transport Forum (ITF) | 2021 | Integrating Public Transport into Mobility as a Service: Summary and Conclusions. | ITF | France, Sweden, Finland, Belgium, Austria, Norway, Netherlands, UK, Japan, USA, Singapore | Synthesis of expert discussions and pre-prepared input papers | The expert roundtable and pre-existing materials (e.g., ITF Roundtable Discussion) | Synthesis of case studies and best practices | The report found that pilot studies showed users prioritize convenience over sustainability, and warned of potential negative effects if MaaS induces car demand or substitutes walking/transit trips. | MaaS can facilitate shared mobility adoption by improving convenience and service quality, but requires careful design within sustainable transport policies, flexible regulations, and robust data-sharing to ensure positive impacts. | |
| Interreg Central Europe | 2022 | D.T.1.1.5 CE SUMP 2.0 TOPIC GUIDE:  MAAS IN SUMP | Interreg Central Europe | Hungary, Austria, Poland, Croatia | Guidance document | Secondary data (e.g., EU-funded projects; Partner cities’ action plans) | Synthesis of case studies and best practices | MaaS offers incentives, seamless integration, and digital tools to nudge users toward sustainable travel choices. | Relevant to MaaS deployment in European urban mobility planning. | |
| MaaS Alliance | 2024 | Mobility as a Service (‘MaaS’) Regulatory Models | MaaS Alliance | Netherlands, Austria, Finland, Belgium, Australia, UK | Synthesis and advocacy document | Secondary data (e.g. Reports on carbon footprint; Surveys on travel behavior and modal split) | Synthesis of case studies and best practices | The report positioned MaaS as integrating transport forms into unified on-demand platforms that overcome multimodality challenges, creating virtuous cycles where increased alternative mode use drives policy support through green incentives like carbon credits. | MaaS platforms influence sustainable travel by simplifying multimodal access, expanding shared mobility, and using policy coordination with incentives, though requiring complementary measures like congestion charging to reduce car dependency. | |
| SCADask | 2024 | The Future of Mobility Insights Report | SCADask | USA | Mixed Method | Quantitative data (survey responses); Qualitative data (Gen Z user interviews; expert interviews) | Synthesis of case studies and best practices | The report identified Generation Z’s core mobility values as safety, reliability, eco-awareness, digital integration, and personalization, proposing AI-powered integration, modular subscription vehicles, social matchmaking services, and gamified reward systems to enhance sustainable transport adoption. | MaaS platforms need to integrate advanced AI personalization, flexible sharing models, social connectivity features, and behavioral gamification to align with Generation Z values and effectively promote sustainable travel behavior change among this demographic. | |
